# Supplementary material for: Record-high hyperpolarizabilities in conjugated polymers
Source: Royal Society of Chemistry journal article supplement (doi:10.1039/c4tc00616j), 2014-01-01
Supplement: c4tc00616j1.pdf [file c4tc00616j1.pdf]

## Record-high hyperpolarizabilities in conjugated polymers

Stijn Van Cleuvenbergen, Inge Asselberghs, Wouter Vanormelingen, Thierry Verbiest, Edith Franz, Koen Clays, Mark G. Kuzyk, Guy Koeckelberghs

### Supporting Information

The absorption spectrum of Pa is depicted in Figure 1. The HOMO-LUMO (La) transition is situated at 321 nm. Additionally, two weak Lb transitions can be found at higher wavelengths.

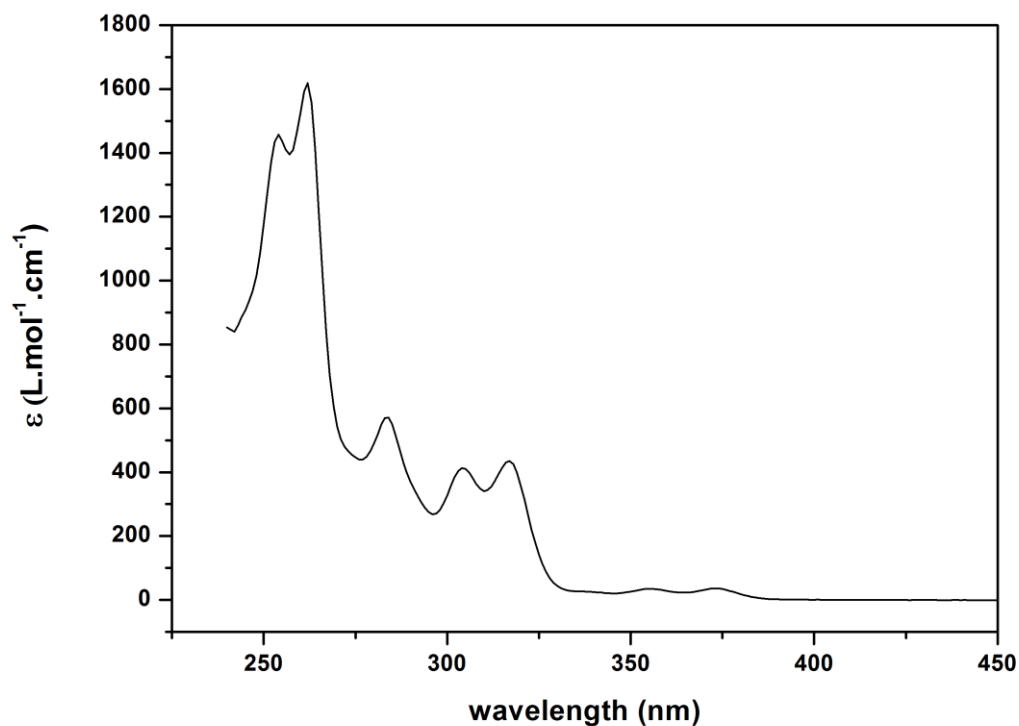

Figure 1. UV-vis spectrum of the **Pa** monomer. The HOMO-LUMO (La) transition is situated at 321 nm. Two weak Lb transitions can be found at higher wavelengths.
